# Supplementary material
Source: ML conference proceedings conference paper supplement (https://openreview.net/forum?id=X5B2yTT97A)

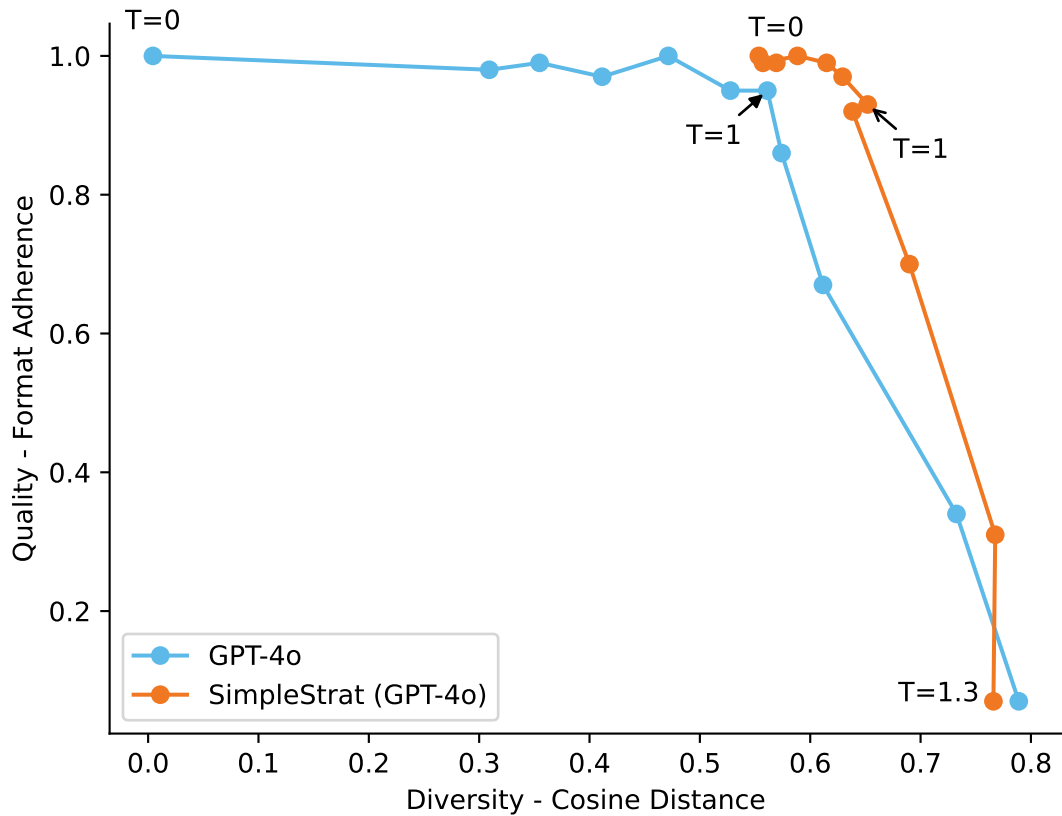

Supplement: supplementary_material [file writing_prompts_formatting_recall.pdf › coverage_qa_neurips/writing_prompts/plots/writing_prompts_formatting_recall.pdf]

Quality-Diversity Tradeoff

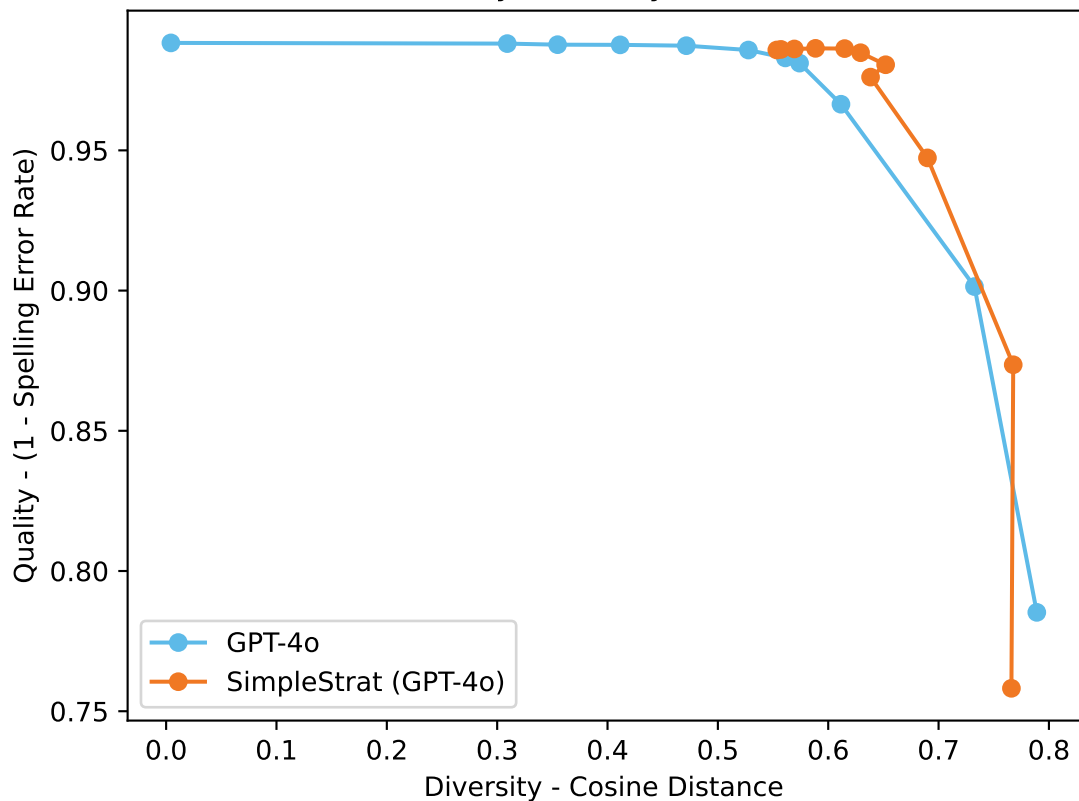

Supplement: supplementary_material [file writing_prompts_spelling_recall.pdf › coverage_qa_neurips/writing_prompts/plots/writing_prompts_spelling_recall.pdf]

Formatting Error vs Temperature

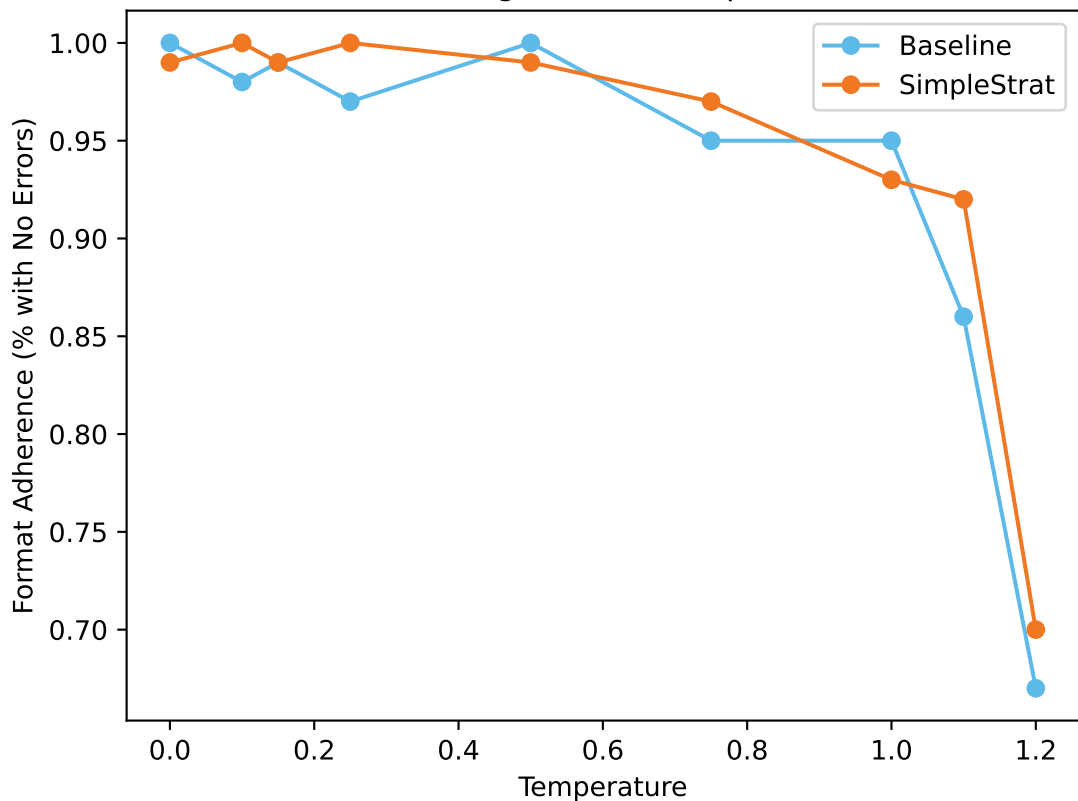

Supplement: supplementary_material [file writing_prompts_temperature_formatting.pdf › coverage_qa_neurips/writing_prompts/plots/writing_prompts_temperature_formatting.pdf]

# Temperature-Diversity Tradeoff

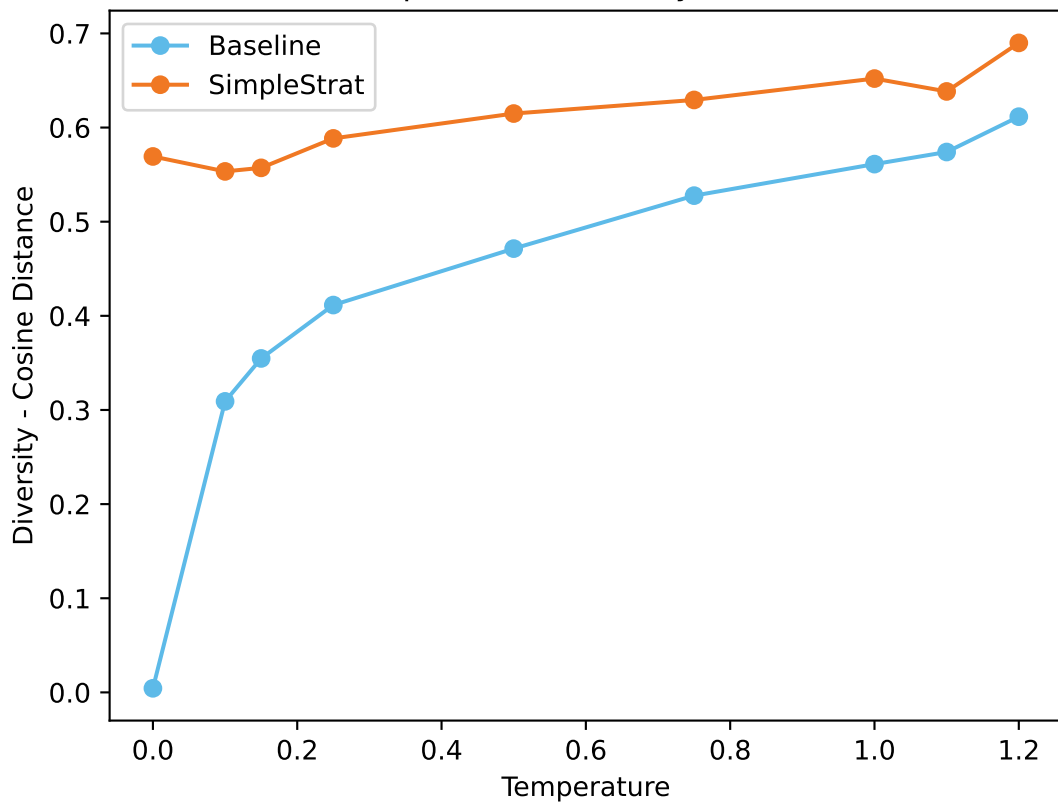

Supplement: supplementary_material [file writing_prompts_temperature_spelling.pdf › coverage_qa_neurips/writing_prompts/plots/writing_prompts_temperature_spelling.pdf]
